# Supplementary material for: Distance from a Fishing Community Explains Fish Abundance in a No-Take Zone with Weak Compliance
Source: PLoS One. 2015 May 7;10(5):e0126098. doi: 10.1371/journal.pone.0126098 (PMC4423979; doi:10.1371/journal.pone.0126098)
Supplement: S1 Table — Data corresponds to Fig 2. (XLSX) [file pone.0126098.s003.xlsx]

## Sheet: S1 Table
S1 Table. Mean abundance (1000 m-2 ± SE) of fish families at 3 and 10 m across the three zones; take-zone North TZ (N), the no-take zone NTZ, and take-zone South TZ (S). Data corresponds to Fig. 2.
Family	Zone	Mean abundance at 3m (1000 m-2)	Standard Error at 3m	Mean abundance at 10m (1000 m-2)	Standard Error at 10m
Pomacanthidae	TZ (N)	0.555556	0.183946	0.518519	0.160335
	NTZ	0.111111	0.0604812	0.333333	0.104757
	TZ (S)	0.962963	0.259161	0.407407	0.204606
Lutjanidae	TZ (N)	0.185185	0.117554	0.185185	0.0912801
	NTZ	0.0740741	0.050401	0.148148	0.145379
	TZ (S)	0.666667	0.27716	0.37037	0.174885
Lethrinidae	TZ (N)	0.481481	0.109499	1.40741	0.340496
	NTZ	0.814815	0.347584	1.18519	0.301059
	TZ (S)	0.740741	0.275136	1.77778	0.532441
Epinephelidae	TZ (N)	0.37037	0.166857	2.11111	0.302406
	NTZ	1.07407	0.256204	2.40741	0.30207
	TZ (S)	1.14815	0.244016	2.03704	0.284398
Acanthuridae	TZ (N)	80.5185	6.51186	63.963	5.32239
	NTZ	58.2222	6.10748	38.1481	2.21771
	TZ (S)	50.0741	3.23684	35.037	2.39311
Chaetodontidae	TZ (N)	12.2963	1.07957	11.4074	0.811879
	NTZ	10.2593	1.25663	10.6667	1.03836
	TZ (S)	12.2222	1.45375	11.4074	0.697358
Scaridae	TZ (N)	6.66667	0.838052	7.96296	1.06636
	NTZ	6.81481	0.731492	7.11111	0.858002
	TZ (S)	3.92593	0.647727	6.96296	1.07277
Siganidae	TZ (N)	5.62963	0.737303	4.59259	0.626921
	NTZ	3.74074	0.478889	6.2963	0.680544
	TZ (S)	5.77778	0.733919	7.96296	0.736062
