# Supplementary material for: Distance from a Fishing Community Explains Fish Abundance in a No-Take Zone with Weak Compliance
Source: PLoS One. 2015 May 7;10(5):e0126098. doi: 10.1371/journal.pone.0126098 (PMC4423979; doi:10.1371/journal.pone.0126098)
Supplement: S2 Dataset — (XLSX) [file pone.0126098.s002.xlsx]

## Sheet: S2 Dataset
Zone	Depth	Transect#	Replicate	Transect_ID	Corallivore	Herbivore	Invertivore	Omnivore	Piscivore
TZN	3	1	A	TZN_3_1_A	8	56	3	3	0
TZN	3	1	B	TZN_3_1_B	10	93	3	9	0
TZN	3	1	C	TZN_3_1_C	8	85	0	6	5
TZN	3	2	A	TZN_3_2_A	4	56	2	2	0
TZN	3	2	B	TZN_3_2_B	1	99	0	7	0
TZN	3	2	C	TZN_3_2_C	11	109	2	8	0
TZN	3	3	A	TZN_3_3_A	2	46	3	1	0
TZN	3	3	B	TZN_3_3_B	6	44	1	8	1
TZN	3	3	C	TZN_3_3_C	2	84	2	2	0
TZN	3	4	A	TZN_3_4_A	5	125	7	2	0
TZN	3	4	B	TZN_3_4_B	13	110	1	3	0
TZN	3	4	C	TZN_3_4_C	3	92	0	5	3
TZN	3	5	A	TZN_3_5_A	7	112	1	1	0
TZN	3	5	B	TZN_3_5_B	13	99	2	5	0
TZN	3	5	C	TZN_3_5_C	7	51	4	4	2
TZN	3	6	A	TZN_3_6_A	6	86	3	5	0
TZN	3	6	B	TZN_3_6_B	4	75	1	6	0
TZN	3	6	C	TZN_3_6_C	11	64	5	8	1
TZN	3	7	A	TZN_3_7_A	11	50	0	2	0
TZN	3	7	B	TZN_3_7_B	6	119	1	2	1
TZN	3	7	C	TZN_3_7_C	6	95	3	14	0
TZN	3	8	A	TZN_3_8_A	5	52	1	13	0
TZN	3	8	B	TZN_3_8_B	7	171	3	9	0
TZN	3	8	C	TZN_3_8_C	2	102	0	5	0
TZN	3	9	A	TZN_3_9_A	5	45	0	0	0
TZN	3	9	B	TZN_3_9_B	3	141	1	1	0
TZN	3	9	C	TZN_3_9_C	4	152	3	9	0
NTZ	3	1	A	NTZ_3_1_A	5	91	5	10	1
NTZ	3	1	B	NTZ_3_1_B	7	130	2	4	0
NTZ	3	1	C	NTZ_3_1_C	3	77	5	5	1
NTZ	3	2	A	NTZ_3_2_A	10	75	9	7	3
NTZ	3	2	B	NTZ_3_2_B	6	95	2	9	0
NTZ	3	2	C	NTZ_3_2_C	8	34	3	3	0
NTZ	3	3	A	NTZ_3_3_A	7	85	3	2	0
NTZ	3	3	B	NTZ_3_3_B	9	91	1	2	2
NTZ	3	3	C	NTZ_3_3_C	4	66	0	4	0
NTZ	3	4	A	NTZ_3_4_A	7	67	1	2	1
NTZ	3	4	B	NTZ_3_4_B	4	144	0	1	0
NTZ	3	4	C	NTZ_3_4_C	10	88	0	2	0
NTZ	3	5	A	NTZ_3_5_A	5	72	1	5	1
NTZ	3	5	B	NTZ_3_5_B	10	69	5	15	0
NTZ	3	5	C	NTZ_3_5_C	14	75	2	5	2
NTZ	3	6	A	NTZ_3_6_A	6	101	0	5	1
NTZ	3	6	B	NTZ_3_6_B	4	70	1	10	2
NTZ	3	6	C	NTZ_3_6_C	7	85	3	8	2
NTZ	3	7	A	NTZ_3_7_A	5	32	1	1	2
NTZ	3	7	B	NTZ_3_7_B	1	21	0	0	0
NTZ	3	7	C	NTZ_3_7_C	6	44	0	4	5
NTZ	3	8	A	NTZ_3_8_A	1	21	1	0	0
NTZ	3	8	B	NTZ_3_8_B	0	21	0	2	1
NTZ	3	8	C	NTZ_3_8_C	1	32	1	1	0
NTZ	3	9	A	NTZ_3_9_A	1	20	0	1	0
NTZ	3	9	B	NTZ_3_9_B	3	25	6	2	2
NTZ	3	9	C	NTZ_3_9_C	0	24	0	1	0
TZS	3	1	A	TZS_3_1_A	5	64	2	2	1
TZS	3	1	B	TZS_3_1_B	8	45	3	1	1
TZS	3	1	C	TZS_3_1_C	1	64	2	3	0
TZS	3	2	A	TZS_3_2_A	0	27	0	0	0
TZS	3	2	B	TZS_3_2_B	2	50	6	3	2
TZS	3	2	C	TZS_3_2_C	3	60	4	2	3
TZS	3	3	A	TZS_3_3_A	1	46	5	0	1
TZS	3	3	B	TZS_3_3_B	0	54	3	8	0
TZS	3	3	C	TZS_3_3_C	2	67	0	3	1
TZS	3	4	A	TZS_3_4_A	10	35	0	3	0
TZS	3	4	B	TZS_3_4_B	8	50	1	5	5
TZS	3	4	C	TZS_3_4_C	5	39	2	1	3
TZS	3	5	A	TZS_3_5_A	6	56	0	3	4
TZS	3	5	B	TZS_3_5_B	12	47	1	9	1
TZS	3	5	C	TZS_3_5_C	7	29	3	4	0
TZS	3	6	A	TZS_3_6_A	19	62	0	10	0
TZS	3	6	B	TZS_3_6_B	8	51	2	7	0
TZS	3	6	C	TZS_3_6_C	5	50	1	5	0
TZS	3	7	A	TZS_3_7_A	4	107	27	8	5
TZS	3	7	B	TZS_3_7_B	5	94	8	19	2
TZS	3	7	C	TZS_3_7_C	5	91	6	19	3
TZS	3	8	A	TZS_3_8_A	9	56	3	2	1
TZS	3	8	B	TZS_3_8_B	5	58	2	8	2
TZS	3	8	C	TZS_3_8_C	5	81	2	8	2
TZS	3	9	A	TZS_3_9_A	6	50	6	1	1
TZS	3	9	B	TZS_3_9_B	1	80	1	9	0
TZS	3	9	C	TZS_3_9_C	1	49	2	9	0
TZN	10	1	A	TZN _10_1_A	7	57	2	4	0
TZN	10	1	B	TZN _10_1_B	3	64	2	7	0
TZN	10	1	C	TZN _10_1_C	10	69	10	7	1
TZN	10	2	A	TZN _10_2_A	7	54	5	13	0
TZN	10	2	B	TZN _10_2_B	3	64	2	5	1
TZN	10	2	C	TZN _10_2_C	8	77	2	8	2
TZN	10	3	A	TZN _10_3_A	2	44	1	9	0
TZN	10	3	B	TZN _10_3_B	4	43	5	10	1
TZN	10	3	C	TZN _10_3_C	1	81	5	8	1
TZN	10	4	A	TZN _10_4_A	2	66	5	2	0
TZN	10	4	B	TZN _10_4_B	3	33	1	3	0
TZN	10	4	C	TZN _10_4_C	2	155	6	5	2
TZN	10	5	A	TZN _10_5_A	0	74	4	7	0
TZN	10	5	B	TZN _10_5_B	2	55	4	6	0
TZN	10	5	C	TZN _10_5_C	4	58	6	10	0
TZN	10	6	A	TZN _10_6_A	2	66	3	10	0
TZN	10	6	B	TZN _10_6_B	2	52	3	10	1
TZN	10	6	C	TZN _10_6_C	7	70	5	8	3
TZN	10	7	A	TZN _10_7_A	9	30	0	3	0
TZN	10	7	B	TZN _10_7_B	1	110	2	9	0
TZN	10	7	C	TZN _10_7_C	3	140	2	4	0
TZN	10	8	A	TZN _10_8_A	4	52	4	4	0
TZN	10	8	B	TZN _10_8_B	9	101	3	10	0
TZN	10	8	C	TZN _10_8_C	2	94	8	9	2
TZN	10	9	A	TZN _10_9_A	2	57	2	12	1
TZN	10	9	B	TZN _10_9_B	5	111	10	9	1
TZN	10	9	C	TZN _10_9_C	0	89	3	5	0
NTZ	10	1	A	NTZ_10_1_A	4	58	6	1	4
NTZ	10	1	B	NTZ_10_1_B	7	79	1	11	1
NTZ	10	1	C	NTZ_10_1_C	5	49	1	8	0
NTZ	10	2	A	NTZ_10_2_A	12	67	5	4	0
NTZ	10	2	B	NTZ_10_2_B	3	56	2	2	0
NTZ	10	2	C	NTZ_10_2_C	1	49	4	3	0
NTZ	10	3	A	NTZ_10_3_A	6	46	15	0	1
NTZ	10	3	B	NTZ_10_3_B	2	35	5	3	0
NTZ	10	3	C	NTZ_10_3_C	3	48	4	4	1
NTZ	10	4	A	NTZ_10_4_A	0	48	6	8	1
NTZ	10	4	B	NTZ_10_4_B	4	40	2	3	2
NTZ	10	4	C	NTZ_10_4_C	6	39	4	3	4
NTZ	10	5	A	NTZ_10_5_A	4	42	2	11	0
NTZ	10	5	B	NTZ_10_5_B	4	33	1	2	0
NTZ	10	5	C	NTZ_10_5_C	4	52	5	9	1
NTZ	10	6	A	NTZ_10_6_A	4	65	1	18	3
NTZ	10	6	B	NTZ_10_6_B	6	31	5	8	2
NTZ	10	6	C	NTZ_10_6_C	16	71	6	6	2
NTZ	10	7	A	NTZ_10_7_A	4	49	1	10	0
NTZ	10	7	B	NTZ_10_7_B	4	43	4	4	2
NTZ	10	7	C	NTZ_10_7_C	4	30	1	1	0
NTZ	10	8	A	NTZ_10_8_A	0	31	0	8	1
NTZ	10	8	B	NTZ_10_8_B	3	38	0	7	2
NTZ	10	8	C	NTZ_10_8_C	1	41	4	4	2
NTZ	10	9	A	NTZ_10_9_A	1	43	1	15	1
NTZ	10	9	B	NTZ_10_9_B	2	42	1	3	1
NTZ	10	9	C	NTZ_10_9_C	1	39	3	8	2
TZS	10	1	A	TZS_10_1_A	11	40	3	2	1
TZS	10	1	B	TZS_10_1_B	8	38	6	3	1
TZS	10	1	C	TZS_10_1_C	12	40	5	9	1
TZS	10	2	A	TZS_10_2_A	5	27	1	6	0
TZS	10	2	B	TZS_10_2_B	7	52	7	6	5
TZS	10	2	C	TZS_10_2_C	4	28	10	2	0
TZS	10	3	A	TZS_10_3_A	2	25	3	4	5
TZS	10	3	B	TZS_10_3_B	7	16	2	5	1
TZS	10	3	C	TZS_10_3_C	4	51	5	5	1
TZS	10	4	A	TZS_10_4_A	5	38	1	1	1
TZS	10	4	B	TZS_10_4_B	6	34	1	8	1
TZS	10	4	C	TZS_10_4_C	7	46	2	4	1
TZS	10	5	A	TZS_10_5_A	7	40	2	4	2
TZS	10	5	B	TZS_10_5_B	0	34	2	5	4
TZS	10	5	C	TZS_10_5_C	10	49	1	2	1
TZS	10	6	A	TZS_10_6_A	5	46	0	0	1
TZS	10	6	B	TZS_10_6_B	3	60	0	6	1
TZS	10	6	C	TZS_10_6_C	3	48	2	3	3
TZS	10	7	A	TZS_10_7_A	1	48	11	5	1
TZS	10	7	B	TZS_10_7_B	4	82	9	6	1
TZS	10	7	C	TZS_10_7_C	4	70	14	6	5
TZS	10	8	A	TZS_10_8_A	3	53	5	8	3
TZS	10	8	B	TZS_10_8_B	4	59	3	6	1
TZS	10	8	C	TZS_10_8_C	4	73	4	6	2
TZS	10	9	A	TZS_10_9_A	0	45	6	5	0
TZS	10	9	B	TZS_10_9_B	6	55	7	6	1
TZS	10	9	C	TZS_10_9_C	6	41	6	6	3
